# Supplementary material for: Bioinspired ginsenoside Rg3 PLGA nanoparticles coated with tumor-derived microvesicles to improve chemotherapy efficacy and alleviate toxicity
Source: Royal Society of Chemistry journal article supplement (doi:10.1039/d4bm00159a), 2024-01-01
Supplement: d4bm00159a1.pdf [file d4bm00159a1.pdf]

## Supporting Information

### Bioinspired ginsenoside Rg3 PLGA nanoparticles coated with tumor-derived microvesicles to improve chemotherapy efficacy and alleviating toxicity

Shulei Zhang<sup>a</sup>, Bo Zheng<sup>a</sup>, Yiqi Wei<sup>a</sup>, Yuhao Liu<sup>a</sup>, Lan Yang<sup>a</sup>, Yujiao Qiu<sup>b</sup>, Jing Su<sup>a</sup>,

Mingfeng Qiu<sup>a,\*</sup>

<sup>a</sup> School of Pharmacy, Shanghai Jiao Tong University, Shanghai 200240, China

<sup>b</sup> The Wharton School and School of Nursing, University of Pennsylvania, 19104, Philadelphia, USA

\*Corresponding Author: Mingfeng Qiu. E-mail: mfqiu@sjtu.edu.cn (M. Qiu).

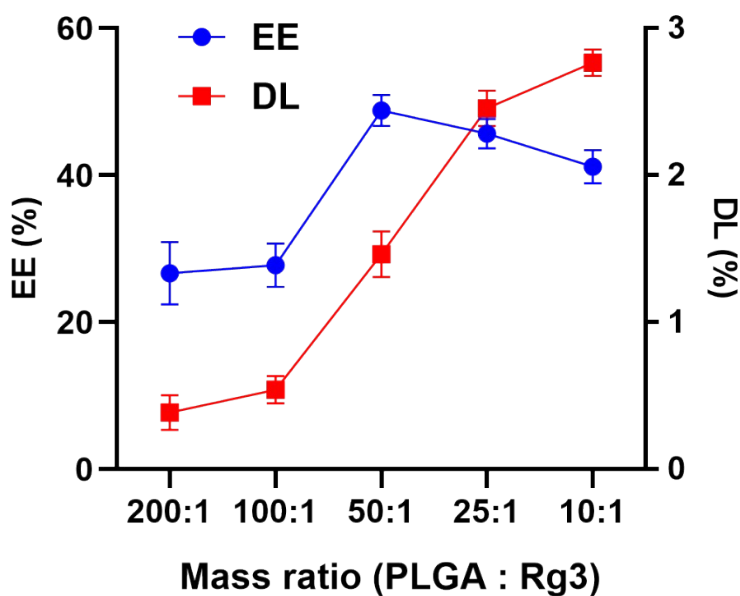

**Fig. S1** Encapsulation efficiency (EE) and drug loading (DL) capacity of Rg3 in Rg3-PLGA at different mass ratio.

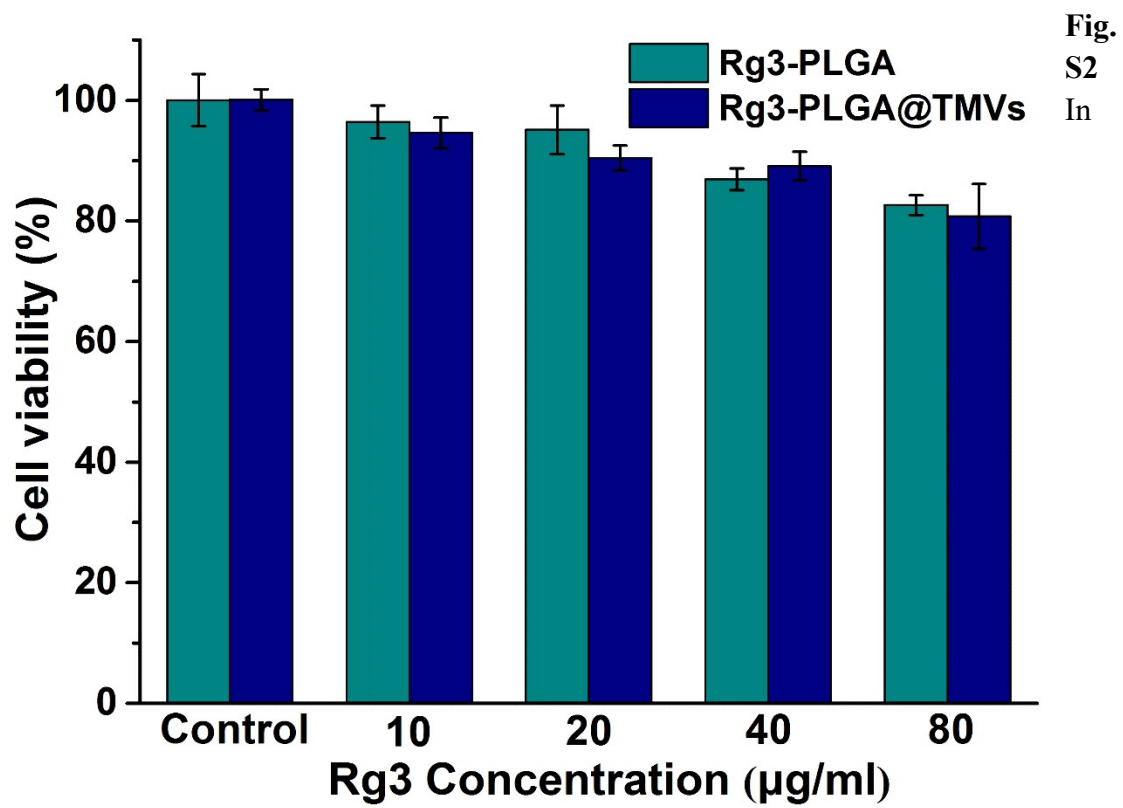

in vitro cytotoxicity effect of Rg3-PLGA or Rg3-PLGA@TMVs on 4T1 tumor cells.

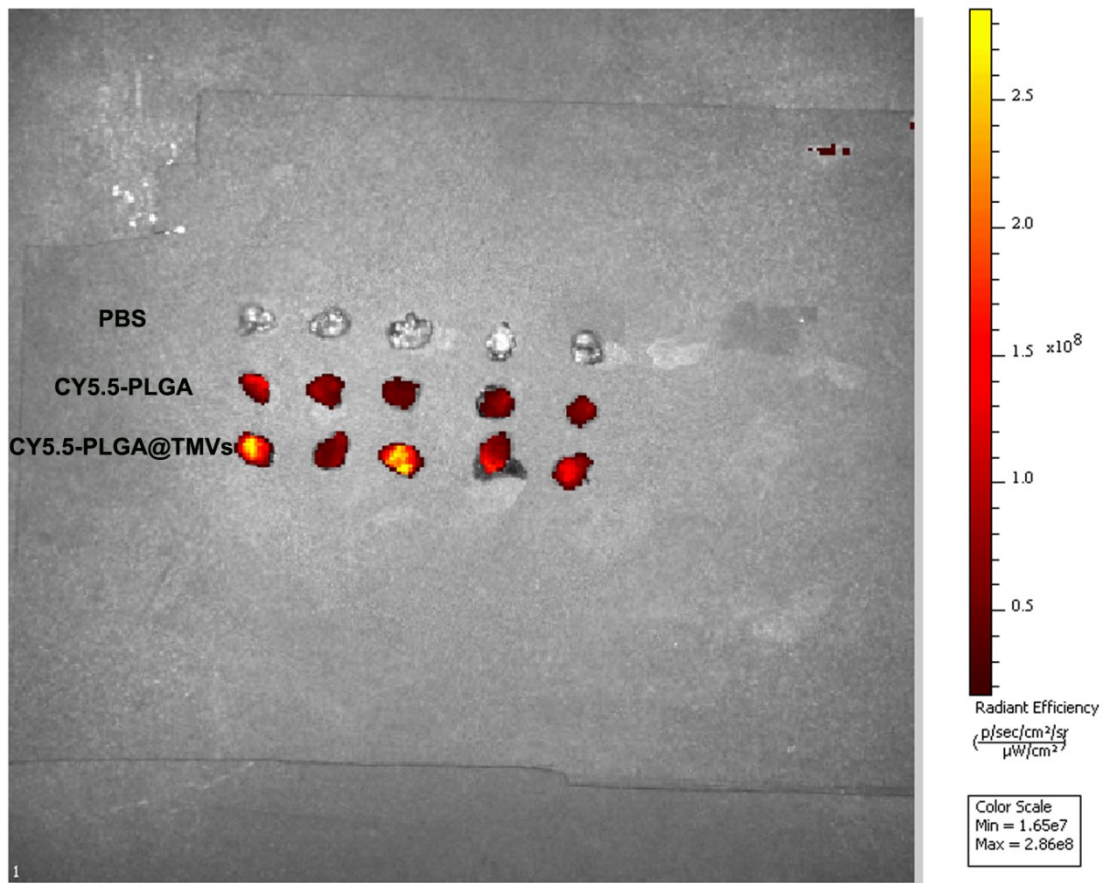

**Fig. S3** In vivo biodistribution of CY5.5-labeled PLGA or CY5.5-labeled PLGA@T-MPs at tumor site after 24 h post injection through IVIS.
